# Supplementary material for: Wnt activity defines colon cancer stem cells and is regulated by the microenvironment
Source: Springer Nature journal article supplement (doi:10.1038/ncb2048), 2010-04-25
Supplement: 41556_2010_BFncb2048_MOESM18_ESM.pdf [file 41556_2010_BFncb2048_MOESM18_ESM.pdf]

DOI: 10.1038/ncb2048

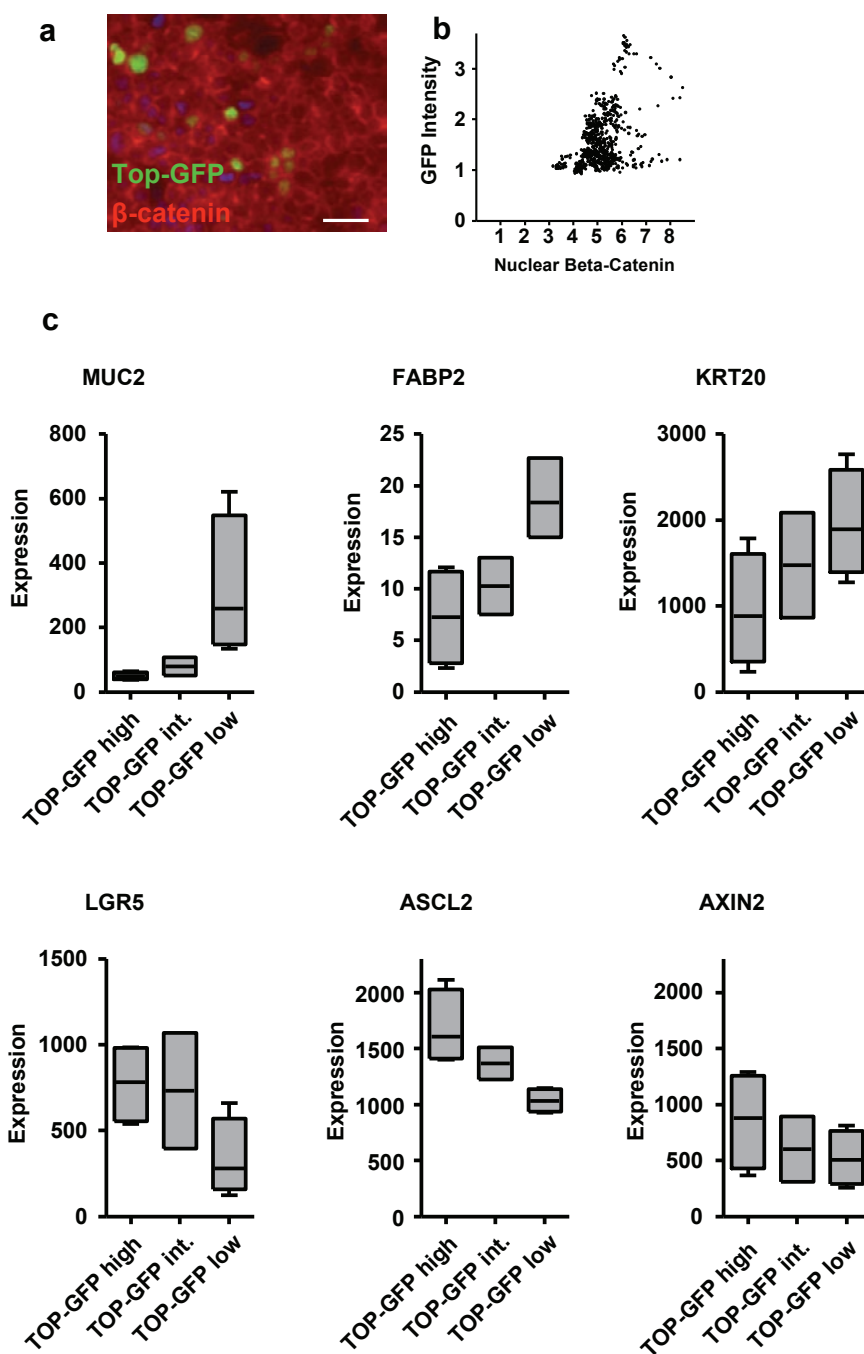

**Figure S1** TOP-GFP expression and relation with nuclear  $\beta$ -catenin, wnt targets and differentiation markers. (a) Co-immunostaining of TOP-GFP spheroid culture with GFP and  $\beta$ -catenin antibody demonstrates a clear correlation between TOP-GFP levels and nuclear localization of  $\beta$ -catenin (scale bar, 50 $\mu$ m), quantification shown in (b). (c) Microarray analysis of a specific gene-set in high, intermediate and low TOP-GFP cell

fractions indicates gradual increase in differentiation marker expression and a decrease in Wnt target gene expression from TOP-GFP<sup>high</sup> to TOP-GFP<sup>low</sup> populations (Each box plot represents a minimal of two data points from separate single-cell cloned TOP-GFP CSC cultures). Genes were picked based on significant differences observed in Fig 1d.

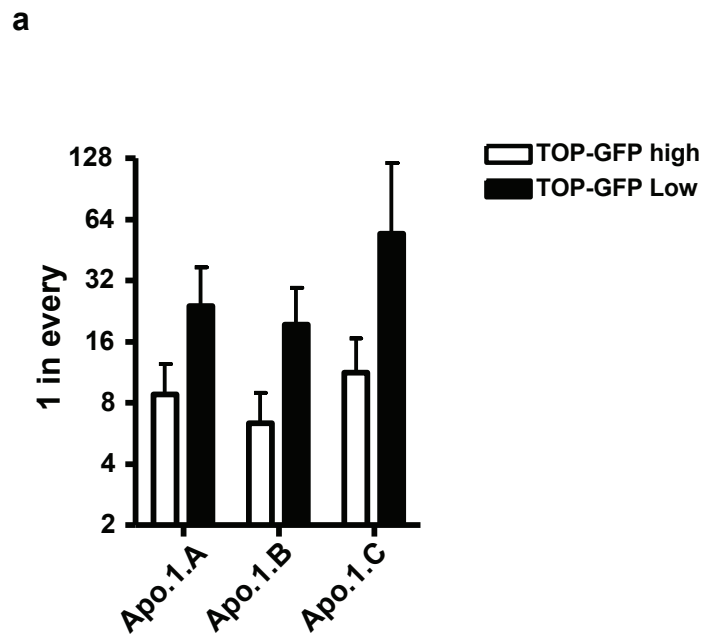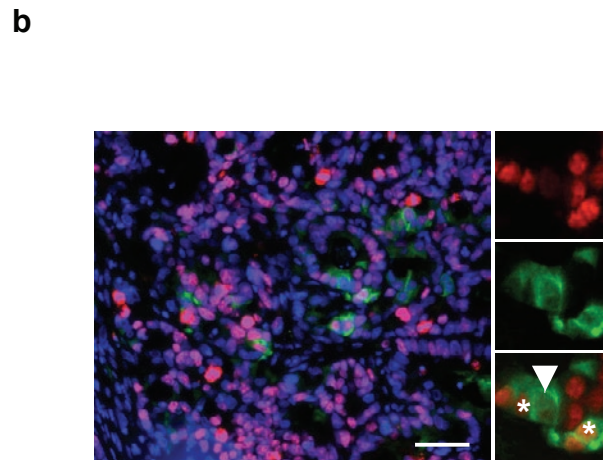

**Figure S2** Limiting dilution on various clones, Ki-67 staining. **(a)** Limiting dilution assay and clonogenic potential of 3 independent lines derived from the same patient as Apo.1 (Apo.1.A, Apo.1.B and Apo.1.C). Errors bars represent 95% CI. Representative examples are shown. See Methods for details on limiting dilution assays. **(b)** Ki-67 co-staining with GFP in TOP-GFP xenografts. Ki-67 positivity encompasses both GFP positive and negative cells. Scale bar, 100 $\mu$ m.

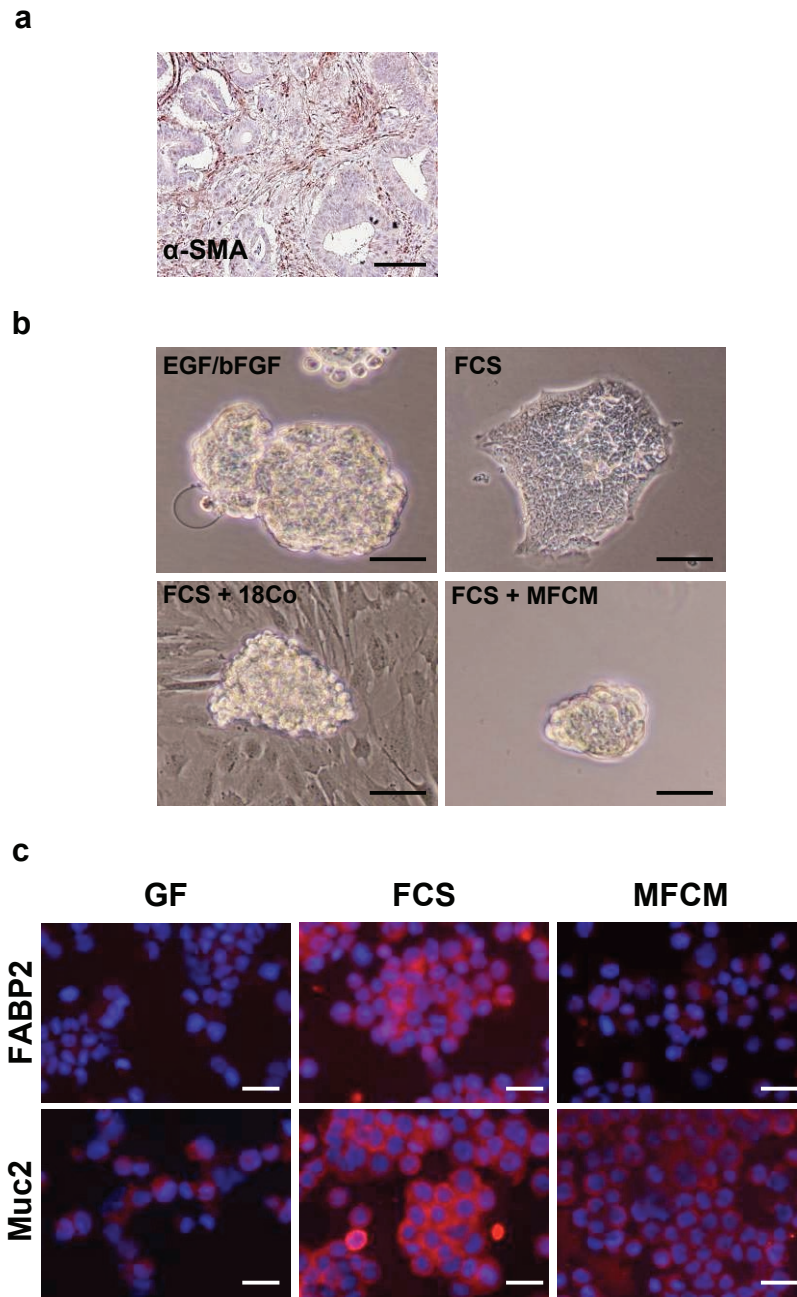

**Figure S3** Myofibroblasts prevent differentiation of colon CSCs. (a) Immunohistochemistry for  $\alpha$ -SMA shows myofibroblasts in the stroma of primary human colorectal malignancies. (Scale bar, 50 $\mu$ m) (b) Phase contrast pictures to show morphological differentiation of CSC. Upper left represents a spheroid culture growing in medium containing EGF and bFGF, upper right is after differentiation in 2% FCS. Lower left is

differentiation with 2% FCS, but plated on myofibroblasts (18Co) and lower right is differentiation with FCS in the presence of MFCM. (Scale bar, 20 $\mu$ m) (c) Immunofluorescence for FABP2 and Muc2 on cytopins of spheroid cells (EGF/bFGF) or cells induced to differentiate with 2% FCS in the absence (middle) or presence of MFCM (right). (Scale bar, 20 $\mu$ m)

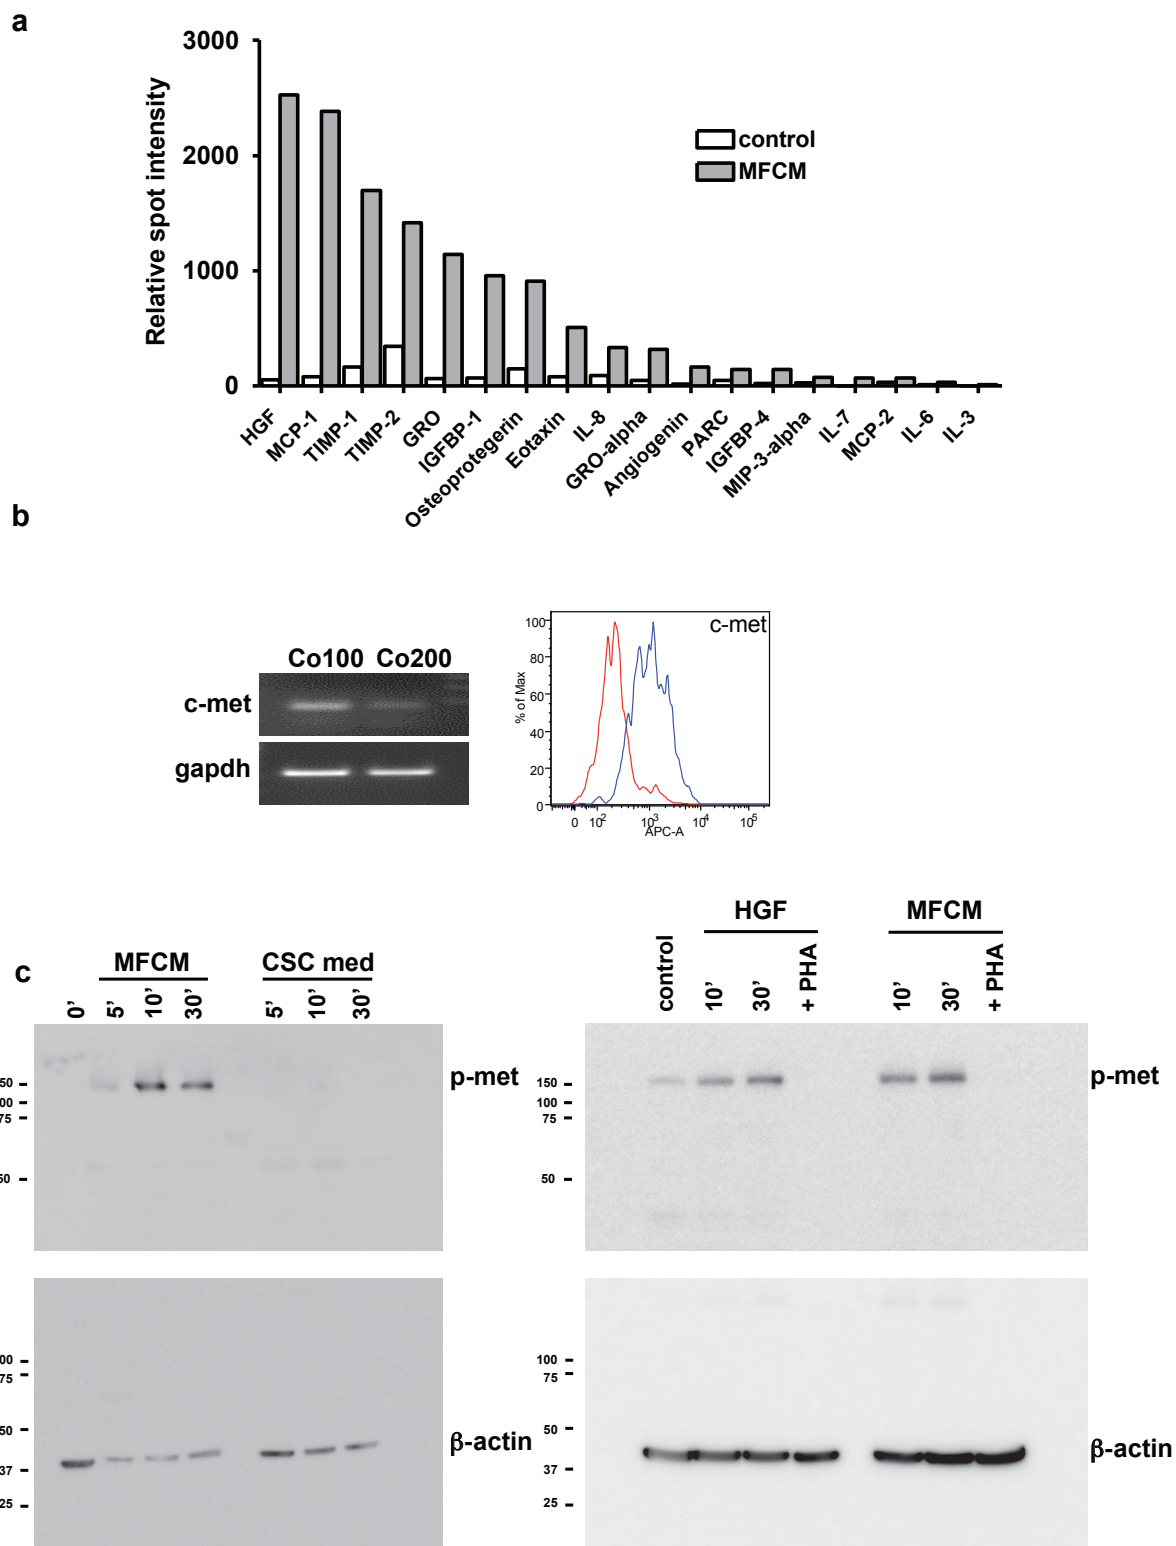

**Figure S4** Myfibroblasts produce HGF and human colon CSCs express c-Met. (a) A graph depicting the detected secreted factors in MFCM (see Methods for details). (b) PCR showing expression of c-Met in spheroid cultured colon CSCs.

Right panel shows FACS analysis for c-Met. (red; background and blue; c-Met) (c) Full blot of phospho-c-Met and  $\beta$ -actin of Co200 stimulated with  $^{18}\text{Co}$  conditioned medium (MFCM) or CSC control medium for the time indicated.

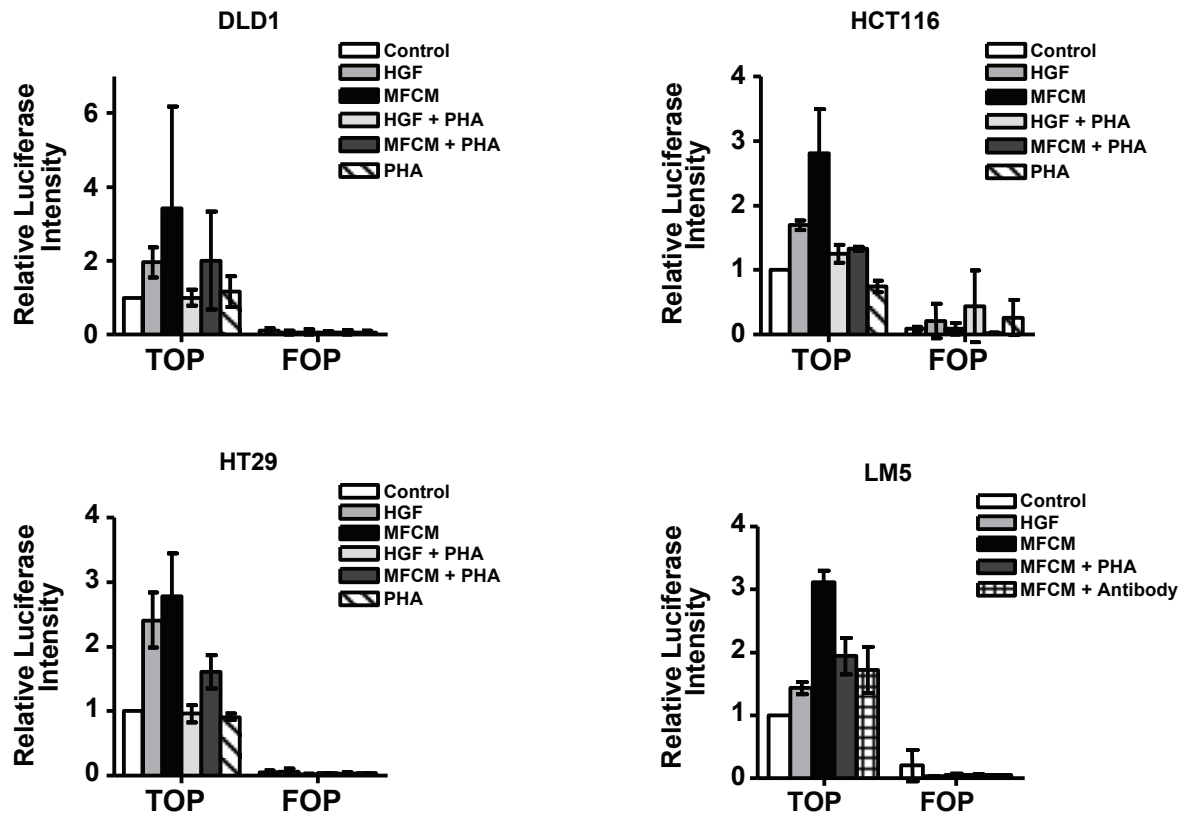

**Figure S5** TOP/FOP assay on various lines and with various conditions. Depicted are the results of TOP/FOP assays on different human colon cancer lines including several established colorectal cancer lines (DLD1, HCT116,

HT29). LM5 is a liver metastasis derived primary CSC line. The stimulatory effect of MFCM is HGF dependent. Error bars represent SEM (n=3), data from at least 2 replicates is shown.

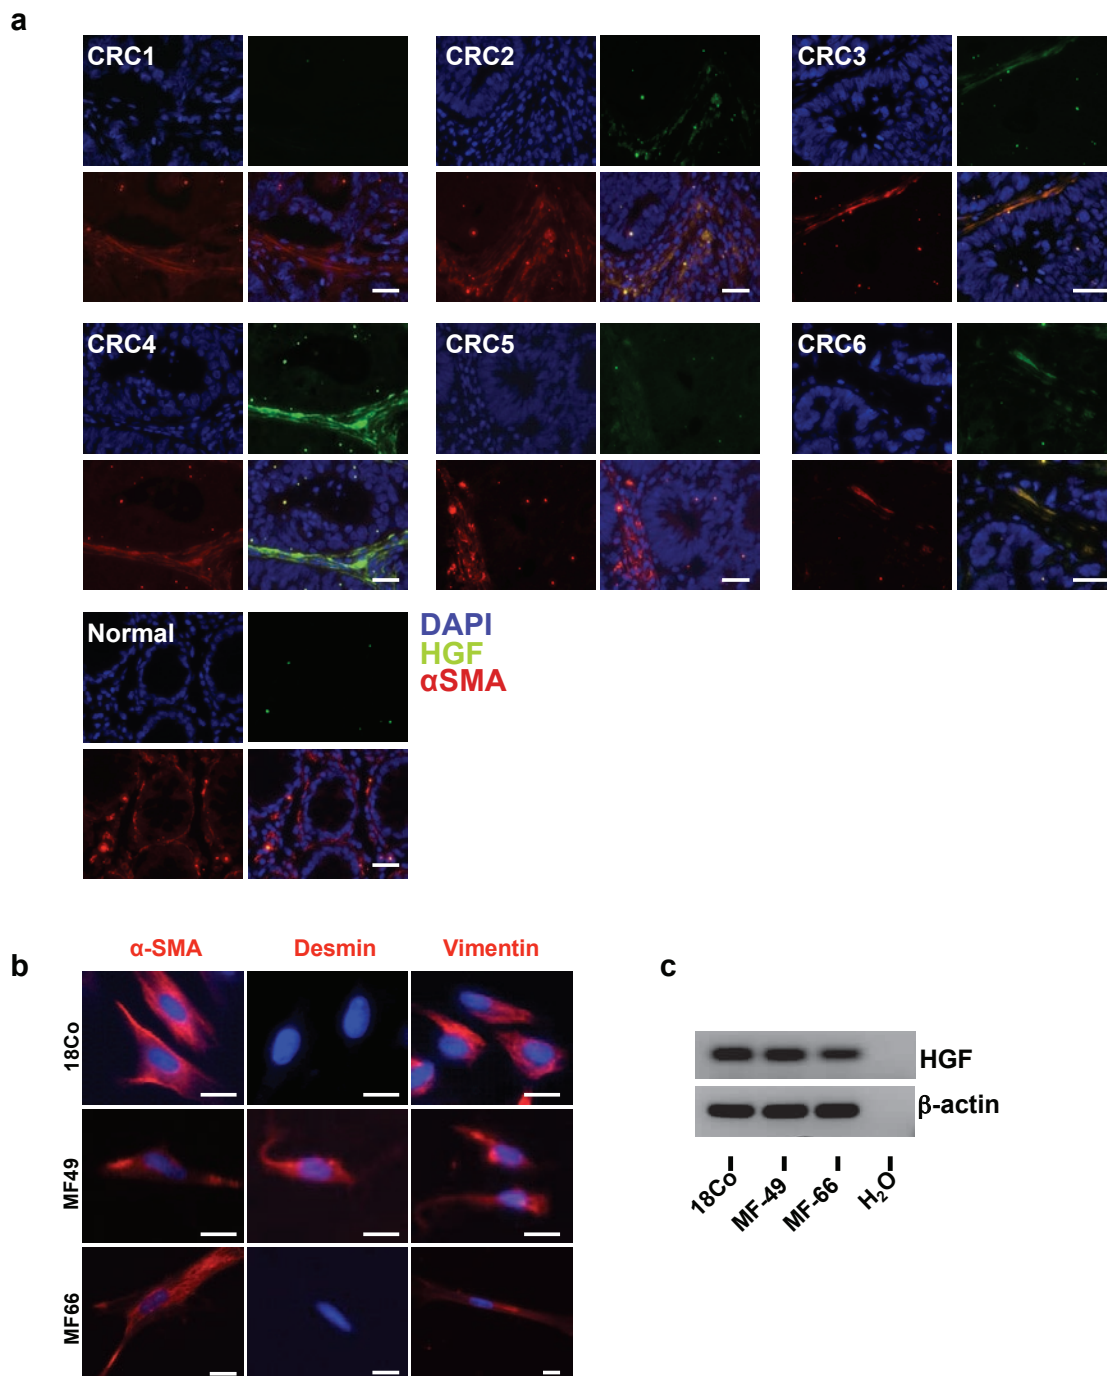

**Figure S6** Human colon carcinoma associated myofibroblasts express HGF. Six different human primary colorectal cancer specimens and one normal human colon specimen was stained for both HGF and  $\alpha$ -SMA. In 4 out of 6 samples we detected HGF in  $\alpha$ -SMA-positive cells. Scale Bars, 50 $\mu$ m.

(b) Both an established colon myofibroblast line (18Co) as well as two primary lines (MF49, MF66) isolated from colorectal cancer patients express markers associated with myofibroblasts (Scale bars, 20 $\mu$ m) and reveal HGF production by (c) PCR.

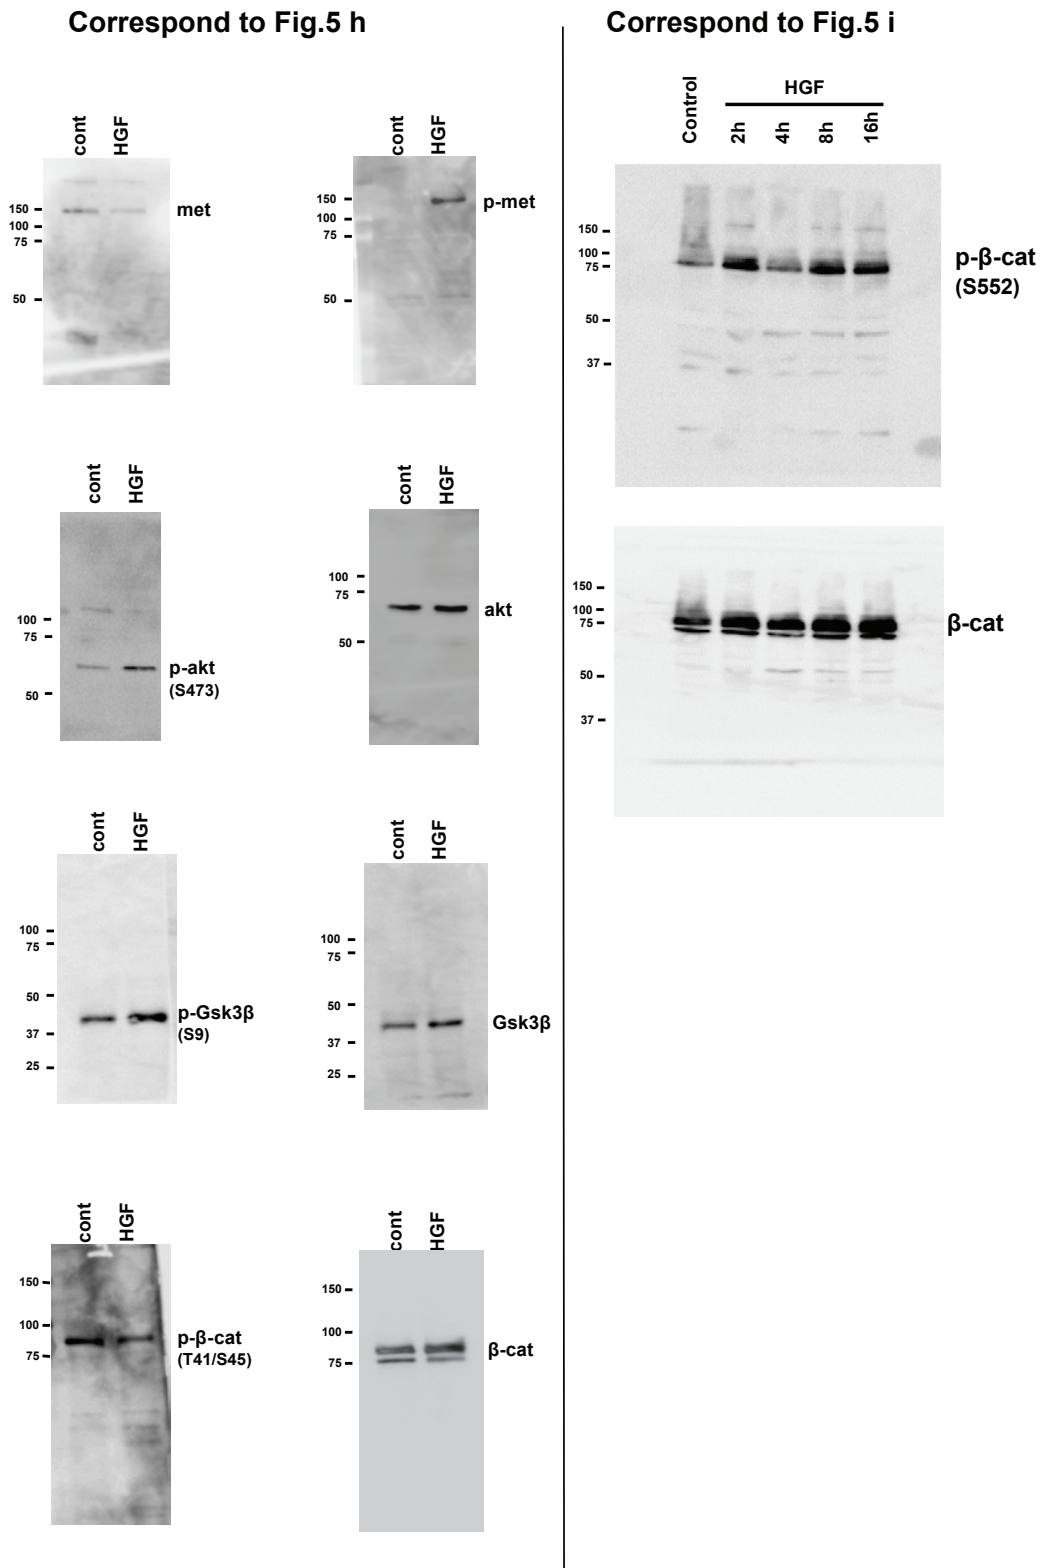

Figure S7 Full blots. Represented are the full Western blots of Fig. 5h and i.



**Table S1** Genes showing most differential expression between TOP-GFP<sup>high</sup> and TOP-GFP<sup>low</sup> cell populations. A list of the most differentially regulated genes in the TOP-GFP<sup>high</sup> versus TOP-GFP<sup>low</sup> fractions from two different single cell cultures is summarized in Table S1, indicated values represent Log<sub>2</sub> fold-changes.

**Table S2** List of primers used in this study.

**Table S1**

| Gene       | Probeset    | G7   | A4   |
|------------|-------------|------|------|
| FABP1      | 205892_s_at | -4.9 | -1.7 |
| AKR1B10    | 206561_s_at | -4.6 | -2.5 |
| MUC2       | 204673_at   | -3.6 | -1.8 |
| ST6GALNAC1 | 227725_at   | -3.2 | -1.5 |
| GCNT3      | 219508_at   | -2.7 | -1.3 |
| SPINK4     | 207214_at   | -2.4 | -1.5 |
| HEPACAM2   | 242601_at   | -1.9 | -1.7 |
| GMPR       | 204187_at   | 1.8  | 1.5  |
| CAB39L     | 225915_at   | 2.3  | 1.4  |
| TSPAN5     | 209890_at   | 2.5  | 1.5  |
| NEURL1B    | 225355_at   | 2.7  | 1.3  |
| TUBB2B     | 214023_x_at | 2.8  | 1.6  |
| LGR5       | 213880_at   | 2.9  | 1.3  |
| SERPINI1   | 205352_at   | 3.0  | 1.9  |
| LEF1       | 221558_s_at | 3.0  | 1.6  |
| LRP4       | 212850_s_at | 3.1  | 1.4  |
| CXCR4      | 217028_at   | 3.3  | 2.7  |
| SP5        | 235845_at   | 3.7  | 1.9  |
| DEFA5      | 207529_at   | 5.1  | 3.9  |
| APCDD1     | 225016_at   | 5.2  | 4.3  |

**Table S2**

| Primers  | Sequences              |                            |
|----------|------------------------|----------------------------|
|          | Fwd                    | Rev                        |
| Lgr5     | CTGCCTGCAATCTACAAGGT   | CCCTTGGAATGTATGTCAGA       |
| Survivin | GCCCAGTGTCTTCTCTGCTT   | CCGGACGAATGCTTTTATG        |
| Axin2    | CTCCTTATCGTGTGGGCAGT   | CTTCATCCTCTCGGATCTGC       |
| Muc2     | CGAAACCACGGCCACAACGT   | GACCACGGCCCCGTTAAGCA       |
| Krt20    | TGTCCTGCAAATTGATAATGCT | AGACGTATTCCTCTCTCACTCTCATA |
| Fabp2    | TGGAAGGTAGACCGGAGT     | AGGTCCCCCTGAGTTCAGTT       |
| c-Met    | CTGCCTGCAATCTACAAGGT   | ATGGTCAGCCTTGTCCCTC        |
| Hgf      | CCTATTTCTCGTTGTGAAGGT  | TGTTTCGTTTTGGCACAAGA       |
| β-actin  | ATGGAAGAAGAGATCGCCGC   | TCGTAGATGGGCACCGTGTG       |
